# Supplementary material
Source: PubMed Central journal article supplement (PMC3044956)
Supplement: supp_M110.202226_jbc.M110.202226-2.pdf [file supp_M110.202226_jbc.M110.202226-2.pdf]

Supplementary TABLE S1  
*Primer sequences used in this study*

| Protein name          | AGI       | Added restriction site<br>(Forward - Reverse) | Expressed protein | Sequence of forward primer<br>(restriction site is underlined) | Sequence of reverse primer<br>(restriction site is underlined) |
|-----------------------|-----------|-----------------------------------------------|-------------------|----------------------------------------------------------------|----------------------------------------------------------------|
| CsAOR (degenerate)    | -         | -                                             | -                 | GTIGGIGA(C/T)GA(A/G)GTITA(C/T)GG                               | TCIA(A/G)(A/G)TAIGC(A/G)AAIGC(A/G)TC                           |
| CsChlAOR              | -         | -                                             | -                 | GCTAGCACTGGGAAGTTAGA (for 3'RACE)                              | ATTCTCTTCTACGGCCGTG (for 5' RACE)                              |
|                       |           | <i>Bam</i> HI (F)- <i>Xho</i> I (R)           | ORF               | AAGGATCCATGGCAGCGATTCTCGCATC                                   | AACTCGAGTCATGGGATTGGATGTATGA                                   |
|                       | -         | <i>Sal</i> I (F) – <i>Nco</i> I (R)           | ORF + GFP         | AAAGTCGACATGGCAGCGATTCTCGCATC                                  | AACCATGGATGGGATTGGATGTATGACT                                   |
| CsCytAOR              | -         | -                                             | -                 | CATTCCCATCTCTGATACC (for 3'RACE)                               | AGGGGAAAGCCCGGCCGTT (for 5' RACE)                              |
|                       | -         | <i>Bam</i> HI (F) – <i>Eco</i> RI (R)         | ORF               | AAGGATCC ATGAAGGCCTGGGTTTACCAT                                 | AAGAATTC CTATGGGATGGGATAAATCAC                                 |
|                       | -         | <i>Sal</i> I (F) – <i>Nco</i> I (R)           | ORF + GFP         | AAAGTCGACATGGCTGCCGTTTCTATTCC                                  | AACCATGGATGGGATGGGATAAATCACA                                   |
| AtAOR                 | At1g23740 | <i>Bam</i> HI (F)- <i>Sal</i> I (R)           | ORF               | AAGGATCCATGAAGCGTGGGTGTATAGTG                                  | AAGTCGAC TTAAGGAATGGGATAAACAACG                                |
| Alcohol dehydrogenase | At2g29350 | <i>Eco</i> RI (F) – <i>Sal</i> I (R)          | ORF               | AAGAATTCATGGCAAAGGAAGGGGCTTGGGA                                | AAGTCGAC TTATGGCATAGTCTTGAAGGAAAA                              |
| Alcohol dehydrogenase | At4g13180 | <i>Eco</i> RI (F) – <i>Sal</i> I (R)          | ORF               | AAGAATTCATGGAGAATAATCCAAGAAGCTCA                               | AAGTCGAC TTAGACAACAAAGCCTCCATTGGC                              |
| CBR-like enzyme       | At1g01800 | <i>Eco</i> RI (F) – <i>Sal</i> I (R)          | ORF               | AAGAATTCATGGCAGACCCAAGAGTTGCAGTT                               | AAGTCGAC TCAAAAGTTGGAGACATTGGCGCG                              |
| AtCytADH              | At3g61220 | <i>Bam</i> HI (F)- <i>Sal</i> I (R)           | ORF               | AAGGATCC ATGGCAGAGGAAACTCCAAGATAT                              | AAGTCGAC TCAGAATTCTGAAACTTGCTTGCG                              |
|                       | At3g61220 | <i>Sal</i> I (F) – <i>Nco</i> I (R)           | N-terminal + GFP  | AAGTCGAC ATGGCAGAGGAAACTCCAAGATAT                              | AACCATGG CATAGTAGTTTATCTTGATGCATT                              |
| AtCytADH              | At2g24190 | <i>Eco</i> RI (F) – <i>Sal</i> I (R)          | ORF               | AAGAATTC ATGGCTGAGGAATCACCAAGATAT                              | AAGTCGAC TCAGAACTCTGAAACTTGTTTGCG                              |
| AtChlADH              | At3g04000 | <i>Eco</i> RI (F) – <i>Sal</i> I (R)          | ORF               | AAGAATTC ATGGCTGCAGCGTCATCAGTTTCT                              | AAGTCGAC TTACAAGAGACAGCCACCATTAGC                              |
|                       | At3g04000 | <i>Sal</i> I (F) – <i>Nco</i> I (R)           | N-terminal + GFP  | AAGTCGAC ATGGCTGCAGCGTCATCAGTTTCT                              | AACCATGG CTGAGATAGTGAATGATTAGGAT                               |
| AtChlADH              | At1g54870 | <i>Eco</i> RI (F) – <i>Sal</i> I (R)          | ORF               | AAGAATTC ATGAATGTGTTGTGTGTCGAGTGTTT                            | AAGTCGAC TTACGCATTTACCACAGCTCCTCC                              |
|                       | At1g54870 | <i>Sal</i> I (F) – <i>Nco</i> I (R)           | N-terminal + GFP  | AAGTCGAC ATGAATGTGTTGTGTGTCGAGTGTTT                            | AACCATGG AAACATCGATGCGGCCAAAAGCAT                              |
| AtChlAKR              | At2g37770 | <i>Bam</i> HI (F)- <i>Sal</i> I (R)           | ORF               | AAGGATCC ATGGCAAATGCGATCACATTTTTC                              | AAGTCGAC TCATATCTCTGCCATCCCATAATT                              |
|                       | At2g37770 | <i>Sal</i> I (F) – <i>Nco</i> I (R)           | N-terminal + GFP  | AAGTCGAC ATGGCAAATGCGATCACATTTTTC                              | AACCATGG CCGAATCGTATAGTGCTTCCATCG                              |
| AKR                   | At2g37760 | <i>Eco</i> RI (F) – <i>Sal</i> I (R)          | ORF               | AAGAATTC ATGGCAGCTCCGATTTCGATTCTT                              | AAGTCGAC TCAAATTTACCGTCCCACAATTC                               |
| AKR                   | At1g06690 | <i>Bam</i> HI (F)- <i>Sal</i> I (R)           | ORF               | AAGGATCC ATGGCCATGGCTACGCACTTCACC                              | AAGTCGAC TCAGAGATACTCAACAGGGAAACC                              |
| AKR                   | At2g27680 | <i>Eco</i> RI (F) – <i>Sal</i> I (R)          | ORF               | AAGAATTC ATGCCTGTGTCCGTACATTCCGTT                              | AAGTCGAC TCATATACGTCCGTTATTCGTCTCC                             |
| AKR                   | At1g04420 | <i>Eco</i> RI (F) - <i>Xho</i> I (R)          | ORF               | AAGAATTC ATGGCGTCATCTTACGTCAC CTAC                             | AACTCGAGTCAAACGAAAGAAGGGTCTTTGAAC                              |
